# Supplementary material for: A reference human genome dataset of the BGISEQ-500 sequencer
Source: PubMed Central journal article supplement (PMC5467036; doi:10.1093/gigascience/gix024), 2017-04-01
Supplement: gix024_GIGA-D-16-00103_Revision_1.pdf [file gix024_GIGA-D-16-00103_Revision_1.pdf]

1  
2  
3 **1 A reference human genome dataset of the BGISEQ-500 sequencer**  
4  
5

6  
7 2 Jie Huang<sup>1\*</sup>, Xinming Liang<sup>2\*</sup>, Yuankai Xuan<sup>3\*</sup>, Chunyu Geng<sup>2</sup>, Yuxiang Li<sup>2</sup>, Haorong  
8  
9 3 Lu<sup>2</sup>, Shoufang Qu<sup>1</sup>, Xianglin Mei<sup>3</sup>, Hongbo Chen<sup>1</sup>, Ting Yu<sup>1</sup>, Nan Sun<sup>1</sup>, Junhua Rao<sup>2</sup>,  
10  
11 4 Jiahao Wang<sup>4</sup>, Wenwei Zhang<sup>2</sup>, Ying Chen<sup>2</sup>, Sha Liao<sup>2</sup>, Hui Jiang<sup>2</sup>, Xin Liu<sup>2</sup>, Zhaopeng  
12  
13 5 Yang<sup>1#</sup>, Feng Mu<sup>2#</sup> and Shangxian Gao<sup>1#</sup>  
14

15  
16 6

17 7 \*These authors contribute equally to the article

18 8 #Correspondence: Shangxian Gao, [gaoshangxian@126.com](mailto:gaoshangxian@126.com), Feng Mu [mufeng@genomics.cn](mailto:mufeng@genomics.cn)  
19 and Zhaopeng Yang [yangzp@nifdc.org.cn](mailto:yangzp@nifdc.org.cn)  
20

21 10 <sup>1</sup> National Institutes for food and drug Control (NIFDC), Beijing 100050, P. R. China

22 11 <sup>2</sup> BGI-Shenzhen, Shenzhen 518083, P. R. China

23 12 <sup>3</sup> State Food and Drug Administration Hubei Center for Medical Equipment Quality  
24 Supervision and Testing, Wuhan 430000, P. R. China  
25

26 13 <sup>4</sup> BGI-Qingdao, Qingdao 266555, China  
27  
28  
29  
30  
31  
32  
33  
34  
35  
36  
37  
38  
39  
40  
41  
42  
43  
44  
45  
46  
47  
48  
49  
50  
51  
52  
53  
54  
55  
56  
57  
58  
59  
60  
61  
62  
63  
64  
65

1 **Abstract**

2 **Background:** BGISEQ-500 is a new desktop sequencer developed by BGI. Using the  
3 DNA nanoball (DNB) and combinational probe anchor synthesis (cPAS) developed  
4 from Complete Genomics™ sequencing technologies, it generates short reads in large  
5 scale.

6 **Findings:** Here, we present the first human whole genome sequencing dataset of  
7 BGISEQ-500. The dataset was generated by sequencing the widely used cell line,  
8 HG001 (NA12878) in two sequencing runs of pair-end 50 bp (PE50) and two  
9 sequencing runs of pair-end 100 bp (PE100). We also included examples of the raw  
10 images from the sequencer for reference. Finally, we identified variations using this  
11 dataset, estimated the accuracy of the variations and compared to that of the variations  
12 identified from similar amount of publicly available HiSeq2500 data.

13 **Conclusions:** We found similar SNP detection accuracy for the BGISEQ-500 PE100  
14 data (false positive rate, FPR 0.00020%, and sensitivity 96.11%) comparing to the  
15 PE150 HiSeq2500 data (FPR 0.00017% and sensitivity 96.60%), better than the PE50  
16 data (FPR 0.0006% and sensitivity 94.15%). But for insertions and deletions (indels),  
17 we found lower accuracy for BGISEQ-500 data (FPR 0.00069% and 0.00067% for  
18 PE100 and PE50 respectively, sensitivity 94.30% and 70.93%) than the HiSeq2500 data  
19 (FPR 0.00032% and sensitivity 96.28%). Our dataset can serve as the reference dataset  
20 providing basic information not just for future developing, but also for all the researches  
21 and applications based on the new sequencing platform.

22 **Keywords:** Genomics, sequencing, Next Generation Sequencing, BGISEQ-500

1       **Data Description**

2       Massively parallel sequencing technologies (also called as the second generation  
3       sequencing) generate large amount of data with lower cost, shorter reads and higher  
4       single base error rate comparing to Sanger sequencing technology[1]. With the large  
5       amount of data and well-developed analysis tools, second generation sequencing data  
6       can be used to effectively and accurately identify genomic variations[2]. Thus it has  
7       been widely applied in both researches and applications[3]. Currently there are several  
8       commercially available second generation sequencing platforms with different  
9       performances and data features[4, 5]. With more and more researches and applications  
10      to apply sequencing, new sequencing platforms are being developed. The BGISEQ-500  
11      sequencer was first released by BGI in October, 2015. It was developed based on the  
12      Complete Genomics<sup>TM</sup> sequencing technologies, and applied DNA NanoBalls (DNBs)  
13      technology[6] for sequencing library construction and combined primer anchor  
14      synthesis (cPAS) for sequencing. We present here a dataset generated from the  
15      BGISEQ-500 sequencer, including example of the raw images and the final sequences.  
16      We also conducted variation calling using this dataset and compared the variation  
17      calling result to that from other sequencers. This dataset can be served as a useful  
18      reference for community to develop bioinformatics methods and sequencing based  
19      applications on this new sequencing platform.

20      **DNA preparation**

21      NA12878 cell line genomic DNA was ordered from Coriell Institute, and it was 50 µg  
22      per tube. The genomic DNA was quantified by Qubit 3.0 fluorometer (Life  
23      Technologies, Paisley, UK) and the integrity was qualified on the 2% agarose gel to  
24      make sure the genomic DNA molecular was larger than 23kb and not substantially  
25      degraded.

26      **Sequencing library preparation**

27      For the sequencing library construction, the NA12878 genomic DNA was fragmented  
28      by ultrasonic on Covaris E220 (Covaris, Brighton, UK) to DNA fragments between 50

1 bp~800bp according to the manufacturer's instructions. The fragmented DNA was  
2 further selected to 100bp~300bp by AMPure XP beads (AGENCOURT). The selected  
3 DNA fragments were then repaired to obtain a blunt end and modified at 3' end to get a  
4 dATP as a stick end. The dTTP tailed adapter sequence was ligated to both ends of the  
5 DNA fragments. The ligation product was then amplified for 8cycles and subjected to  
6 the following single strand circularization process. The PCR product was heat-  
7 denatured together with a special molecular which was reverse complemented to one  
8 special strand of the PCR product, and the single strand molecular was ligated using  
9 DNA ligase. The remaining linear molecular was digested with the exonuclease, thus  
10 finally we obtained the single strand circle DNA library (Figure 1a).

## 11 **Sequencing**

12 We conducted sequencing according to the BGISEQ-500 protocol (Figure 1b). There  
13 were three steps including making DNBs, loading DNBs and sequencing. For making  
14 DNBs, 6 ng single strand circle DNA library was first PCR amplified for 10 minutes in  
15 an 80  $\mu$ l reaction volume with pure water, buffer and DNB polymerase. After PCR  
16 reaction, 20  $\mu$ l DNBs stopping buffer was added to stop the PCR reaction. Finally, we  
17 used the Qubit® ssDNA Assay Kit to quantify the DNBs on Qubit® Fluorometer  
18 (concentration  $\geq 10$  ng/ $\mu$ L).

19 For loading DNBs, we first added 33  $\mu$ l DNBs loading buffer to DNBs product from  
20 the last step, and the mixture was placed on the BGIDL-50 (the sample preparation  
21 machine). Then we selected the DNBs loading process (Version: sample load 2.0) to  
22 load DNB onto the sequencing chip, which included 96 minutes' loading time and 30  
23 minutes' incubation at room temperature.

24 Finally, for sequencing, we referred to the BGISEQ-500 protocol. We selected sequence  
25 control software Version 1.1.0.10003, sequence process Version 1.0.06 and ZebraCall  
26 process Version 0.5.0.13875 (the base calling software, and a detailed description can  
27 be found in the next section) for sequencing. Sequencing was initiated after the  
28 sequencing reagents pre-loaded and sequencing chip installed, and this process was

1 finished in ~72 hours.

## 2 **Base calling and raw images**

3 During sequencing, four channels of 16-bit grey scale images were captured by high  
4 resolution sCMOS with ~5.5 million pixels per image. About ~570K DNBs were  
5 loaded onto the grid-patterned arrays of spots which were photolithographically etched  
6 and surface modified on the sequencing chip. The spots were illuminated by the lasers  
7 with different wavelengths. Intensity from neighbor channel would also be observed  
8 due to crosstalk effect. The sequences of DNBs were base-called by the software Zebra  
9 call (base calling software developed for BGISEQ-500). After background subtraction  
10 and registration of images from 4 channels, intensities of DNBs were extracted  
11 according to a template of grid-pattern. Correction within channels and neighbor cycles  
12 was applied to increase the quality and stabilization. The cross-talk between intensities  
13 from the four fluorophores is caused by the imperfect wavelength filtering of optical  
14 filters isolating the bands of wavelength from the four types of fluorophore molecules.  
15 A regression technique can identify correlations in our intensity data and correct for  
16 them. In order to correct the crosstalk between 2 channels (C and G), the correction of  
17 the C background intensity can be found by linear regression after eliminating DNBs  
18 that do have true signal in the C channel. Such DNBs can be identified by searching for  
19 DNBs that have the C intensity as the maximum of the four intensities and to keep just  
20 DNBs that are not too dim or noisy we take only DNBs that have all non-maximum  
21 intensities smaller than 80% of the C intensity. This leaves us with reasonably well  
22 performing DNBs that most likely don't have C at the currently interrogated position.  
23 After the linear regression of these background G intensities as a function of the C  
24 intensities. All of the G intensities can in turn be corrected for this cross-talk from the  
25 C channel by subtracting from them the expected background intensity produced by a  
26 given C intensity. Such regression can be done for each channel and simultaneously  
27 correcting for all of the correlations outlined above using a multiple linear regression.  
28 After all correction steps, the base with highest probability will be called according to

1 the scale of intensities. When the whole sequencing was finished, the binary file with  
2 bases and quality score were converted into FASTQ format with Phred+33 quality score.  
3 In order to mapping the base call quality to Phred+33 score, a prior probability model  
4 was constructed by the scale of intensities from channels. Bases were separated to  
5 10404 groups according to different parameters which may affect the confidence level  
6 of base calling. The base-calling error probabilities( $P$ ) of each group was calculated by  
7 the mismatch distribution from repeated sequencing of the standard reference genome.  
8 Quality scores ( $Q$ ) were calculated by the definition of Phred+33 quality scores:

$$Q = -10 \log_{10} P$$

9  
10 A huge table was constructed and hard coded into the base call program to look up a  
11 corresponding quality score by different parameters.  
12 An example dataset of the images was included and the base calling process was  
13 illustrated in Figure 2.

## 14 **Results**

### 15 **Sequencing data summary**

16 The sequencing data was consisted of four lanes, with two of PE100 and the other two  
17 of PE50 (Table 1). First, we analyzed the sequencing quality by identifying the low  
18 quality reads. We determined low quality reads as reads which had more than 10% bases  
19 with sequencing quality lower than 10, and reads which had more than 1% Ns  
20 (ambiguous bases). In this way, we identified 11.9% (9.2% low quality reads and 2.7%  
21 ambiguous reads) low quality reads in PE100 data and 12.3% low quality raw reads in  
22 PE50 data (5.4% low quality reads and 6.9% ambiguous reads). In order for comparison,  
23 we selected similar amount of data (8 sequencing libraries and 16 lanes, PE150 reads,  
24 ~98.5 G bp data) from a public Illumina HiSeq2500 dataset of this cell line generated  
25 by GIAB (Genome in a Bottle)[8]. Using the same criteria for low quality identification,  
26 we identified 7.95% low quality reads (7.7% low quality reads and 0.25% ambiguous  
27 reads). Excluding those low quality reads, we then further analyzed the reads quality

1 by plotting the distributions of base quality scores and GC content against those of the  
2 HiSeq2500 data (Figure 3). Thus we found higher proportion of low quality reads, more  
3 stable base quality distribution along the reads (Figure 3 a-b) and lower overall single  
4 base quality scores (Figure 3 c). And we observed some secondary peak in the GC  
5 content distribution of BGISEQ-500 data, indicating higher GC bias (Figure 3 d).

### 6 **Variation calling and false positive/negative ratios estimation**

7 In order to further depict the data quality and test applications of the new sequencing  
8 platform, we carried out variation calling using this dataset. We adapted the widely used  
9 pipeline (BWA[9] and GATK[10-12], an illustration of the pipeline and key parameters  
10 can be found in Figure 4a) for variation calling. We observed higher mapping rate,  
11 similar sequencing coverage and similar sequencing uniformity of the two BGISEQ-  
12 500 datasets comparing to the HiSeq2500 dataset (Table 2). The lower unique mapping  
13 rate probably reflected the shorter read length of the dataset (2×50 bp and 2×100 bp  
14 comparing to 2×150 bp). We also observed relatively higher duplication rate, mismatch  
15 rate in the dataset comparing to the HiSeq2500 data (Table 2).

16 In total, we identified ~3.4 million SNPs using the BGISEQ-500 datasets (3.45 million  
17 for PE50 data and 3.48 million for PE100 data), less than 3.6 million SNPs identified  
18 using HiSeq2500 data (Table 3). While for indels (insertion and deletions), we  
19 identified 842,058 from PE100 BGISEQ-500 data, comparing to 553,842 identified  
20 from PE50 BGISEQ-500 data. Using the HiSeq2500 data, we identified 733,797 indels.  
21 The SNPs identified using BGISEQ-500 datasets were similar to those identified from  
22 HiSeq2500 data in different features including dbSNP rate, proportion of SNPs in  
23 different regions related to genes and Ti/Tv (transition/transversion) ratio, which  
24 indirectly reflected the SNP accuracy. We also observed similar situation for indels.

25 Further to assess the accuracy of the variations, we used the high confident variations  
26 previously identified in NA12878 provided by GIAB (Genome in A Bottle)[13]. Using  
27 the methods provided by GIAB, we estimated the false positive rates and sensitivity for  
28 BGISEQ-500 PE50 and PE100 data comparing to those of HiSeq2500 data (Table 4).

1 The SNP sensitivity was lower for the BGISEQ-500 datasets (96.11% for PE100 and  
2 94.15% for PE50) than HiSeq2500 data (97.13%). And the SNP false positive rate (FPR)  
3 was similar for the BGISEQ-500 PE100 data (0.00020%) comparing to HiSeq2500 data  
4 (0.00024%), and lower than the BGISEQ-500 PE50 data (0.0006%). For indels,  
5 BGISEQ-500 PE100 data resulted in better performance with higher sensitivity (94.3%)  
6 than the HiSeq2500 PE150 data with sensitivity of 92.4%. In contrast, HiSeq2500  
7 PE150 data shows lower FPR (0.00046%) than BGISEQ-500 PE100 data (0.00069%).  
8 The BGISEQ-500 PE50 data resulted in sensitivity of 70.9% and FPR of 0.00067%.  
9 The difference performances of indel calling might also be caused by read length  
10 difference (50 or 100 bp comparing to 150 bp), in addition to sequencing quality,  
11 mapping accuracy, etc..

12 Furthermore, to depict variation calling accuracy in different genomic regions, we  
13 compared the false negative rate (FNR), FPR and sensitivity in different genome  
14 context given by GIAB (Table S1). For the coding sequences, data from the two  
15 platforms have similar FNR, FPR and sensitivity (3.85% vs. 2.52%, 0.00012% vs.  
16 0.00015% and 96.15% vs. 97.48% accordingly). For the regions which are difficult to  
17 sequence, including some of the promoters [<http://genomebiology.com/2013/14/5/R51>],  
18 substantially high GC content (>55%) regions, substantially low GC content (<30%)  
19 regions, regions with multiple variations (more than 1 variations within 50 bp), regions  
20 with compound variations, repeats and segmental duplications, BGISEQ-500 data have  
21 higher FNR, lower sensitivity and lower FPR (Figure S1).

22 **Discussion**

23 Using the new sequencer, BGISEQ-500, we obtained one run of PE50 data and the  
24 other run of PE100 data. The raw data were ~135.5 Gbp and ~153.6 Gbp respectively,  
25 and they were generated from two chips (~72h). Thus the sequencing throughput and  
26 turnaround time were comparable to HiSeq2500 sequencer Rapid mode v1 (~80 Gbp  
27 per single flow cell and ~40 hours). Both the single base quality and read quality



1 (reflected by duplication rate, mapping rate and unique mapping rate) were basically  
2 comparable to those of the HiSeq2500 data. Furthermore, the variation calling result  
3 was similar to that identified using similar amount of the HiSeq2500 data, further  
4 reflecting that the sequencer can be used in different researches and applications. With  
5 Future improvements over data quality, sequencing length, different and optimized  
6 insert sizes of the paired reads, as well as specially modified or designed  
7 software/bioinformatics tools, the performance can be further improved. In the  
8 meantime, quality of the whole genome sequencing data also reflected feasibility of  
9 applying this sequencing platform for other sequencing purposes including  
10 transcriptome, epigenome, metagenome etc.. From this first reference dataset of  
11 sequencing data from BGISEQ-500 sequencer, we provided an overview and some  
12 basic information for the new sequencing platform. This dataset can serve as reference  
13 for all the researches using the BGISEQ-500 sequencing platform. And we anticipated  
14 it to help stimulating the further technical improvement and development of novel tools  
15 for accurately analyzing the data.

16

1 **Availability of supporting data**

2 The BGISEQ-500 dataset (sequences) described in this article is available in the  
3 GigaDB repository [<http://gigadb.org/dataset/100252>], and the European Nucleotide  
4 Archive under accession number ERP017158. This GigaDB repository for this article  
5 (<http://dx.doi.org/10.5524/100252>) also contains examples of the raw image data  
6 including images of all the sequencing cycles in a small region and images of the first  
7 and last 10 cycles of the whole flowcell. Future data which are to be generated will also  
8 be updated in this GigaDB repository with versions indicated.

9  
10  
11  
12  
13  
14  
15  
16  
17  
18  
19  
20  
21 **Abbreviations**

22 DNBs: DNA nanoballs; SNPs: Single Nucleotide Polymorphisms; indels: insertions  
23 and deletions

24  
25  
26  
27 **Competing interests**

28 JH, YX, SQ, XM, HC, TY, NS, ZY and SG are involved in the beta test of the BGISEQ-  
29 500 sequencer. X Liang, CG, YL, HL, HJ, X Liu and FM are involved in the BGISEQ-  
30 500 sequencer developing, library construction technology optimization, base calling  
31 software developing, or alpha and beta tests.

32  
33  
34  
35  
36  
37  
38 **Authors' contributions**

39 JH, ZY, FM and SG designed the project. YX, SQ and CG conducted sample  
40 preparation and sequencing library construction. HL, XM, HC, TY and NS conducted  
41 sequencing. X Liang, JR, JW, YL, X Liu, HJ, JR, JW, WZ, YC and SL conducted data  
42 analysis. X Liu, X Liang, YL, CG, HL, JH and HJ wrote the manuscript.

43  
44  
45  
46  
47  
48  
49 **Acknowledgements**

50 This work was supported by following funding: the National High Technology  
51 Research and Development Program ("863" Program) of China (Project No.  
52 2011AA02A115), the Technology Innovation and Developing Plan of Shenzhen  
53 (Project No. CXZZ20140904154910774).

54  
55  
56  
57  
58  
59  
60 **Author details**

1    <sup>1</sup> National Institutes for food and drug Control (NIFDC), Beijing 100050, P. R. China

2    <sup>2</sup> BGI-Shenzhen, Shenzhen 518083, P. R. China

3    <sup>3</sup> State Food and Drug Administration Hubei Center for Medical Equipment Quality

4    Supervision and Testing, Wuhan 430000, P. R. China

5    <sup>4</sup>BGI-Qingdao, Qingdao 266555, China

## References

1. Metzker ML: **Sequencing technologies - the next generation.** *Nat Rev Genet* 2010, **11**(1):31-46.
2. Wang J, Wang W, Li R, Li Y, Tian G, Goodman L, Fan W, Zhang J, Li J, Guo Y *et al*: **The diploid genome sequence of an Asian individual.** *Nature* 2008, **456**(7218):60-65.
3. Goodwin S, McPherson JD, McCombie WR: **Coming of age: ten years of next-generation sequencing technologies.** *Nat Rev Genet* 2016, **17**(6):333-351.
4. Mardis ER: **Next-generation sequencing platforms.** *Annu Rev Anal Chem (Palo Alto Calif)* 2013, **6**:287-303.
5. Quail MA, Smith M, Coupland P, Otto TD, Harris SR, Connor TR, Bertoni A, Swerdlow HP, Gu Y: **A tale of three next generation sequencing platforms: comparison of Ion Torrent, Pacific Biosciences and Illumina MiSeq sequencers.** *BMC Genomics* 2012, **13**:341.
6. Drmanac R, Sparks AB, Callow MJ, Halpern AL, Burns NL, Kermani BG, Carnevali P, Nazarenko I, Nilsen GB, Yeung G *et al*: **Human genome sequencing using unchained base reads on self-assembling DNA nanoarrays.** *Science* 2010, **327**(5961):78-81.
7. Andrews S: **FastQC, a quality control tool for high throughput sequence data.** 2016.
8. Zook JM, Catoe D, McDaniel J, Vang L, Spies N, Sidow A, Weng Z, Liu Y, Mason CE, Alexander N *et al*: **Extensive sequencing of seven human genomes to characterize benchmark reference materials.** *Sci Data* 2016, **3**:160025.
9. Li H, Durbin R: **Fast and accurate short read alignment with Burrows-Wheeler transform.** *Bioinformatics* 2009, **25**(14):1754-1760.
10. McKenna A, Hanna M, Banks E, Sivachenko A, Cibulskis K, Kernytsky A, Garimella K, Altshuler D, Gabriel S, Daly M *et al*: **The Genome Analysis Toolkit: a MapReduce framework for analyzing next-generation DNA sequencing data.** *Genome Res* 2010, **20**(9):1297-1303.
11. DePristo MA, Banks E, Poplin R, Garimella KV, Maguire JR, Hartl C, Philippakis AA, del Angel G, Rivas MA, Hanna M *et al*: **A framework for variation discovery and genotyping using next-generation DNA sequencing data.** *Nat Genet* 2011, **43**(5):491-498.
12. Van der Auwera GA, Carneiro MO, Hartl C, Poplin R, Del Angel G, Levy-Moonshine A, Jordan T, Shakir K, Roazen D, Thibault J *et al*: **From FastQ data to high confidence variant calls: the Genome Analysis Toolkit best practices pipeline.** *Curr Protoc Bioinformatics* 2013, **43**:11 10 11-33.
13. Zook JM, Chapman B, Wang J, Mittelman D, Hofmann O, Hide W, Salit M: **Integrating human sequence data sets provides a resource of benchmark SNP and indel genotype calls.** *Nat Biotechnol* 2014, **32**(3):246-251.
14. Joseph A. N, Ofer I and Noam S *et al*: **Analysis of insertion-deletion from deep-**

**sequencing data: software evaluation for optimal detection.** *Brief Bioinform*  
2013, **14** (1): 46-55.

1  
2  
3  
4  
5  
6  
7  
8  
9  
6

1  
2  
3  
4  
5  
6  
7  
8  
9  
10  
11  
12  
13  
14  
15  
16  
17  
18  
19  
20  
21  
22  
23  
24  
25  
26  
27  
28  
29  
30  
31  
32  
33  
34  
35  
36  
37  
38  
39  
40  
41  
42  
43  
44  
45  
46  
47  
48  
49  
50  
51  
52  
53  
54  
55  
56  
57  
58  
59  
60  
61  
62  
63  
64  
65

1 **Figure Legends**

2 **Figure 1. Flowchart of library construction and sequencing.** The library  
3 construction includes fragmentation, size selection, end-repair and A-tailing, adaptor  
4 ligation and PCR amplification and splint circularization (**a**). The sequencing includes  
5 making DNBs, loading DNBs and sequencing (**b**).  
6

7 **Figure 2. Raw image data processing on the BGISEQ-500 platform. a. Registration**  
8 **of images from different channels.** Relative coordinates will be calculated according  
9 to the pattern layout of DNBs. **b. Intensity correction between channels and cycles.**  
10 Correction of the optical and chemical interferences on different channels and the  
11 neighbor cycles was applied. **c. Connecting called bases to FASTQ.** Bases from all  
12 cycles will be collected and converted to FASTQ format. Phred score calculation and  
13 statistics will be applied during the conversion.  
14

15 **Figure 3. Quality control of the dataset after data filtering.** Base-wise quality score  
16 distributions of the first read (**a**, from left to right, BGISEQ-500 PE50, BGISEQ-500  
17 PE100 and HiSeq2500 PE150) and the second read (**b**, from left to right, BGISEQ-500  
18 PE50, BGISEQ-500 PE100 and HiSeq2500 PE150). For each position along the reads,  
19 the quality scores of all reads were used to calculate the mean, median and quantile  
20 values thus the box plot can be shown. The overall quality score distribution of  
21 BGISEQ-500 and HiSeq2500 data (**c**). GC content distribution of the BGISEQ-500 and  
22 HiSeq2500 data (**d**). FastQC [14] was used for the calculation.  
23

24 **Figure 4. Variation calling pipeline used for the assessment.** The major steps  
25 included data filtering, alignment and variation calling, and the major parameters are  
26 also indicated.  
27

1 **Tables**

2 **Table 1. Summary of the dataset\*.**

| Sequencing Type | Read ( $\times 10^6$ ) | Bases (Gbp) | GC content | >Q20   | >Q30   |
|-----------------|------------------------|-------------|------------|--------|--------|
| PE50            | 2,379                  | 118.94      | 41.62%     | 96.00% | 87.02% |
| PE100           | 1,159                  | 115.88      | 41.28%     | 96.39% | 87.13% |

3 \*This dataset was from two runs of the BGISEQ-500 sequencer (PE50 and PE100). ‘>Q20/Q30  
4 percentage’ indicates the percent of bases with quality score ( $-10 \times \lg(\text{error rate})$ ) higher than 20  
5 and 30 (indicating error rates of 1% and 1‰ respectively).

7 **Table 2. Mapping statistics of the dataset\*.**

| Metrics                  | BGISEQ-500      | BGISEQ-500      | HiSeq2500       |
|--------------------------|-----------------|-----------------|-----------------|
|                          | PE50            | PE100           | PE150           |
| Clean reads              | 2,378,725,921   | 1,136,008,901   | 708,941,148     |
| Clean bases (bp)         | 118,936,296,050 | 113,600,890,100 | 104,923,289,904 |
| Mapping rate             | 97.87%          | 99.22%          | 99.05%          |
| Unique rate              | 93.17%          | 96.47%          | 97.06%          |
| Duplicate rate           | 6.26%           | 2.47%           | 1.52%           |
| Mismatch rate            | 0.34%           | 0.58%           | 0.56%           |
| Average sequencing depth | 37.57           | 37.44           | 34.52           |
| Coverage                 | 99.28%          | 99.12%          | 99.06%          |
| Coverage at least 4×     | 98.90%          | 98.69%          | 98.60%          |
| Coverage at least 10×    | 97.97%          | 97.81%          | 97.83%          |
| Coverage at least 20×    | 95.78%          | 96.06%          | 94.81%          |

8 \*The statistics shown here are calculated based on the clean reads (raw reads after filtering, the  
9 two platforms’ data went through the same filtering process). Unique mapping rate indicates  
10 proportion of reads with unique alignment in the genome.

1

2 **Table 3. Variation statistics of the dataset\*.**

|                      | <b>BGISEQ-500</b> | <b>BGISEQ-500</b> | <b>HiSeq2500</b> |
|----------------------|-------------------|-------------------|------------------|
|                      | <b>PE50</b>       | <b>PE100</b>      | <b>PE150</b>     |
| SNPs                 | 3,451,124         | 3,477,642         | 3,609,606        |
| 1000genome and dbSNP | 3,242,083         | 3,288,653         | 3,347,441        |
| 1000genome specific  | 1,260             | 420               | 693              |
| dbSNP specific       | 180,935           | 179,967           | 243,256          |
| dbSNP rate           | 99.19%            | 99.74%            | 99.48%           |
| Novel                | 26,846            | 8,602             | 18,216           |
| Homozygous           | 1,426,328         | 1,433,490         | 1,472,063        |
| Heterzygous          | 2,024,796         | 2,044,152         | 2,137,543        |
| Synonymous           | 19,880            | 20,012            | 20,860           |
| Ti/Tv                | 2.0462            | 2.065             | 2.0427           |
| dbSNP Ti/Tv          | 2.0608            | 2.0693            | 2.0503           |
| Novel Ti/Tv          | 0.8948            | 0.9775            | 1.0544           |
| Indels               | 553,842           | 842,058           | 733,797          |
| 1000genome and dbSNP | 260,157           | 320,741           | 314,161          |
| 1000genome specific  | 7,007             | 22,919            | 20,049           |
| dbSNP specific       | 211,846           | 326,984           | 285,834          |
| dbSNP rate           | 85.22%            | 76.92%            | 81.77%           |
| Novel                | 74,832            | 171,414           | 113,753          |
| Homozygous           | 206,163           | 295,492           | 300,013          |
| Heterzygous          | 347,679           | 546,566           | 433,784          |

3 \*1000genome and dbSNP equals the number of SNPs that are found in both 1000 genome and  
4 dbSNP databases (version 147 was used), 1000genome specific equals the number of SNPs that  
5 are only found in 1000 genomes database. dbSNP rate equals the number of SNPs found in  
6 dbSNP database/total detected SNPs. Novel SNP equals the number of SNPs that are not found



1 in SNP database. Ti/Tv equals the ratio of SNP type are transition/SNP type are transversion.

2 **Table 4. Performances of variation calling of dataset\*.**

|        |                | <b>BGISEQ-500<br/>PE50</b> | <b>BGISEQ-500<br/>PE100</b> | <b>HiSeq2500<br/>PE150</b> |
|--------|----------------|----------------------------|-----------------------------|----------------------------|
| SNPs   | True Positive  | 3,006,132                  | 3,071,579                   | 3,084,449                  |
|        | False Positive | 15,203                     | 6,907                       | 4,318                      |
|        | False Negative | 186,825                    | 121,379                     | 108,508                    |
|        | Precision      | 99.50%                     | 99.78%                      | 99.86%                     |
|        | Sensitivity    | 94.15%                     | 96.20%                      | 96.60%                     |
|        | FPR            | 0.00060%                   | 0.00020%                    | 0.00017%                   |
|        | FNR            | 5.85%                      | 3.80%                       | 3.40%                      |
| indels | True Positive  | 261,867                    | 326,810                     | 355,728                    |
|        | False Positive | 16,931                     | 22,246                      | 7,981                      |
|        | False Negative | 107,311                    | 42,391                      | 13,751                     |
|        | Precision      | 93.93%                     | 93.63%                      | 97.81%                     |
|        | Sensitivity    | 70.93%                     | 88.52%                      | 96.28%                     |
|        | FPR            | 0.00067%                   | 0.00069%                    | 0.00032%                   |
|        | FNR            | 29.7%                      | 11.48%                      | 3.72%                      |

3 \*True Positive (TP), False Positive (FP), False Negative (FN), precision and sensitivity were  
 4 calculated using the software rtg-tools. TP is the number of SNPs that are found in high-  
 5 confidence reference dataset, FP is the number of SNPs that are not found in reference dataset,  
 6 FN is the number of SNPs that are found in high-confidence reference dataset but are not found  
 7 in reference dataset. FPR is calculated using the formula of FP/(all high-confident region  
 8 length-TP-FN), where all high-confident region length equals 252,9164,928bp that comes from  
 9 GIAB released high confidence variants datasets ([ftp://ftp-  
 10 trace.ncbi.nlm.nih.gov/giab/ftp/release/NA12878\\_HG001/NISTv3.3/NA12878\\_GIAB\\_highco  
 11 nf\\_CG-IIIIFB-IIIATKHC-Ion-Solid-10X\\_CHROM1-X\\_v3.3\\_highconf.bed](ftp://ftp-trace.ncbi.nlm.nih.gov/giab/ftp/release/NA12878_HG001/NISTv3.3/NA12878_GIAB_highconf_CG-IIIIFB-IIIATKHC-Ion-Solid-10X_CHROM1-X_v3.3_highconf.bed)). FNR is  
 12 calculated using the formula of FN/(FN+TP).

Figure 1  
a

1 ug Genomic DNA  
≥ 23kb

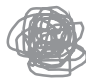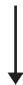

1. Fragmentation

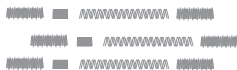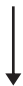

2. Size selection

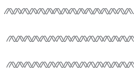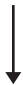

3. End repair and A-tailing

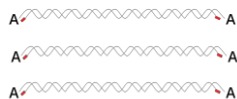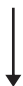

4. Adaptor ligation and PCR

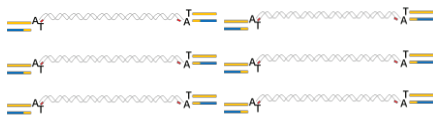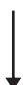

5. Splint circularization

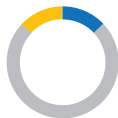

Click here to download Figure 1.pdf 

b

Single strand  
circle DNA

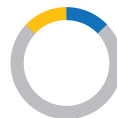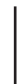

1. Making DNBs

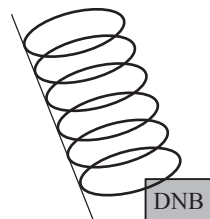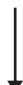

2. Loading DNBs

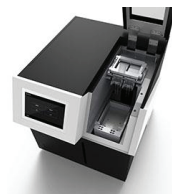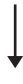

3. Sequencing

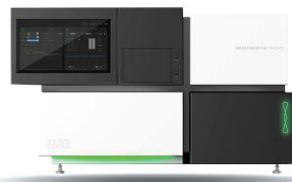

a

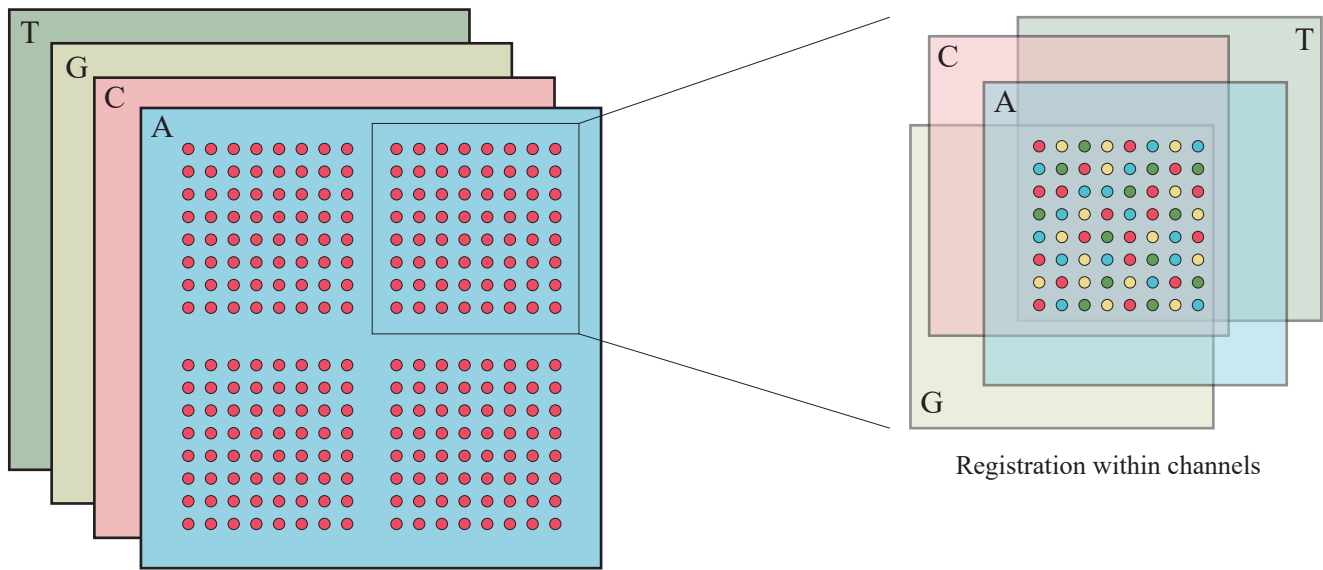

b

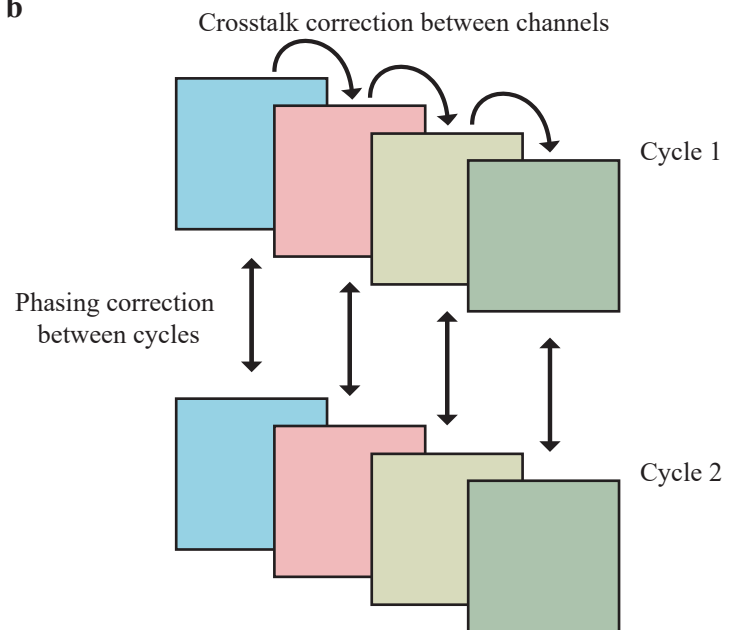

c

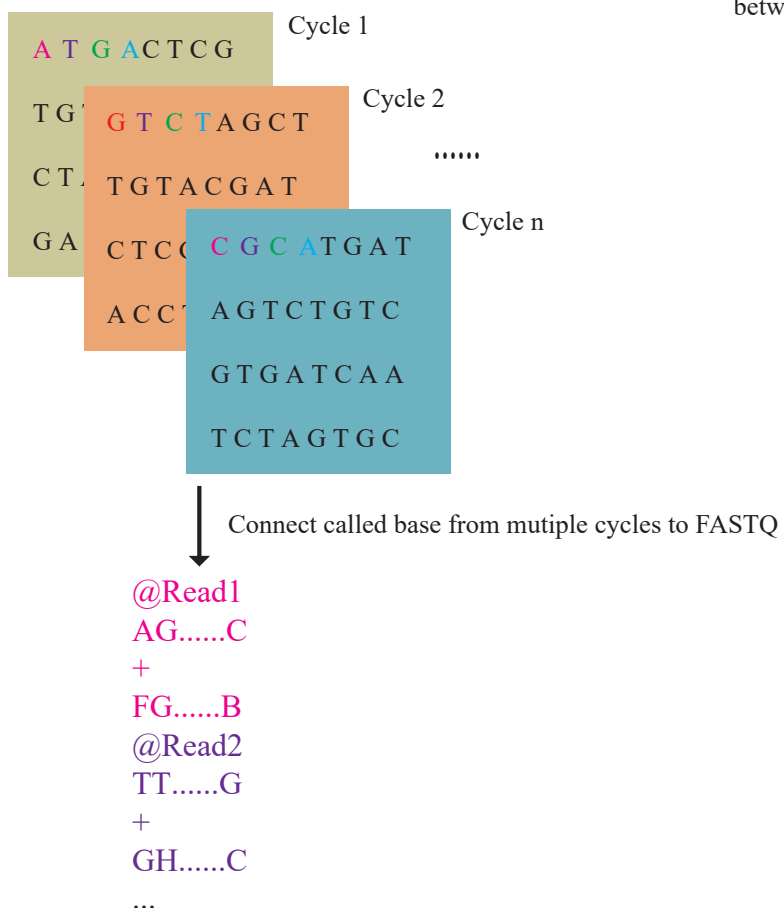

**Figure 3**

[Click here to download Figure 3.pdf](#)

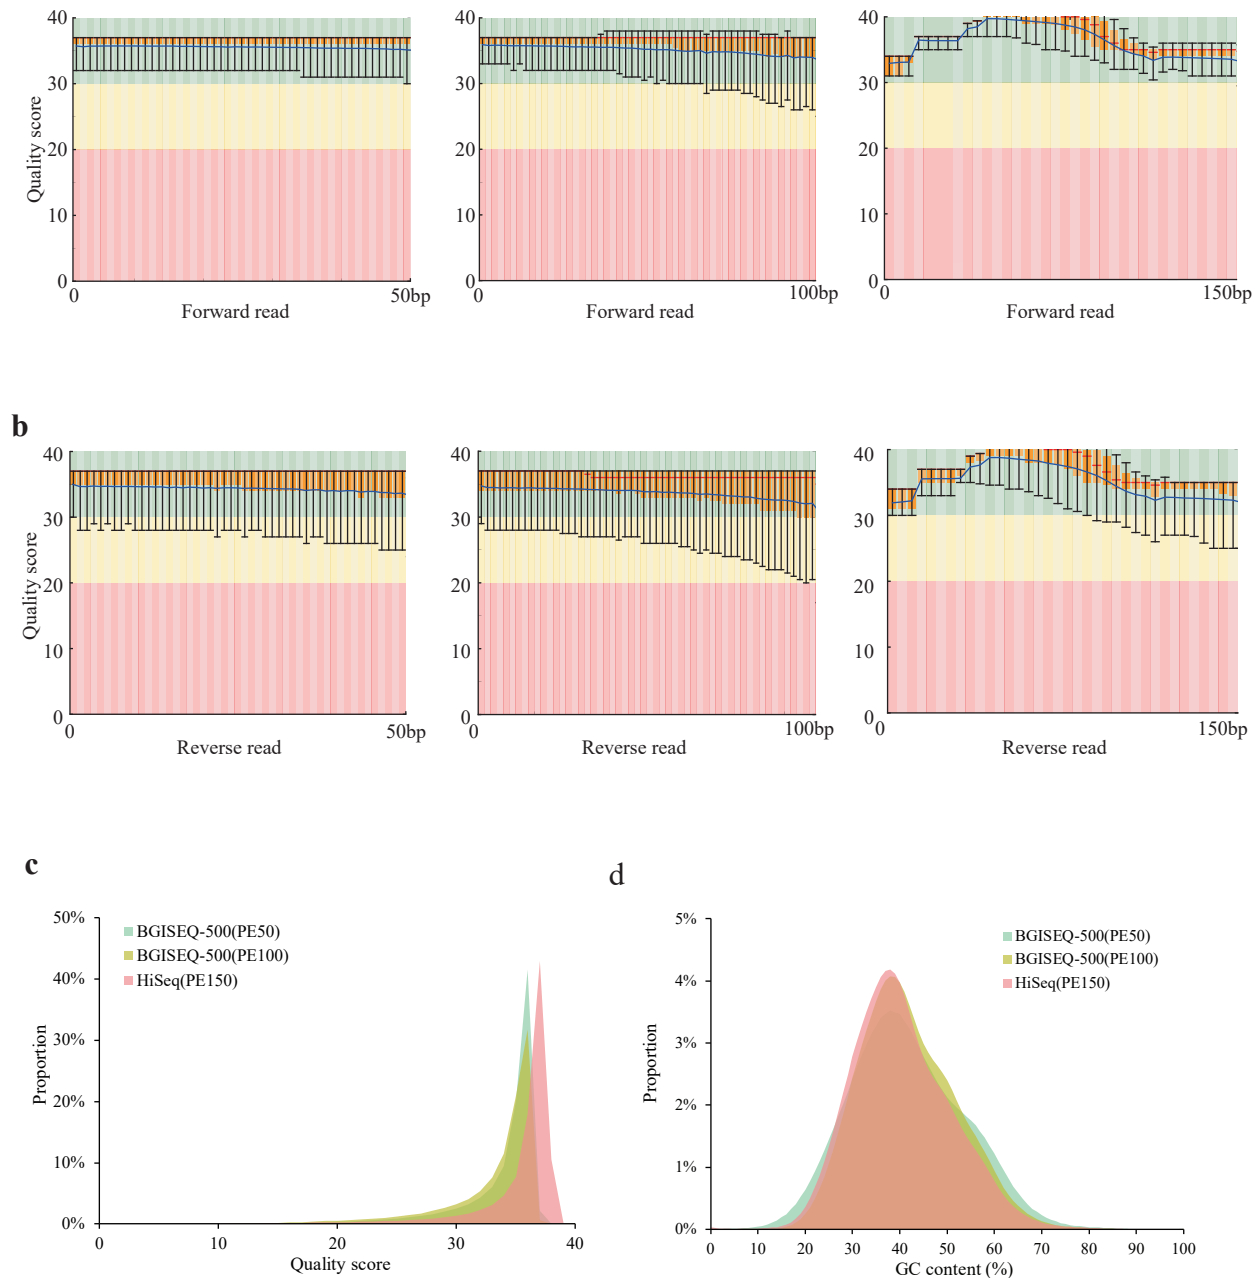

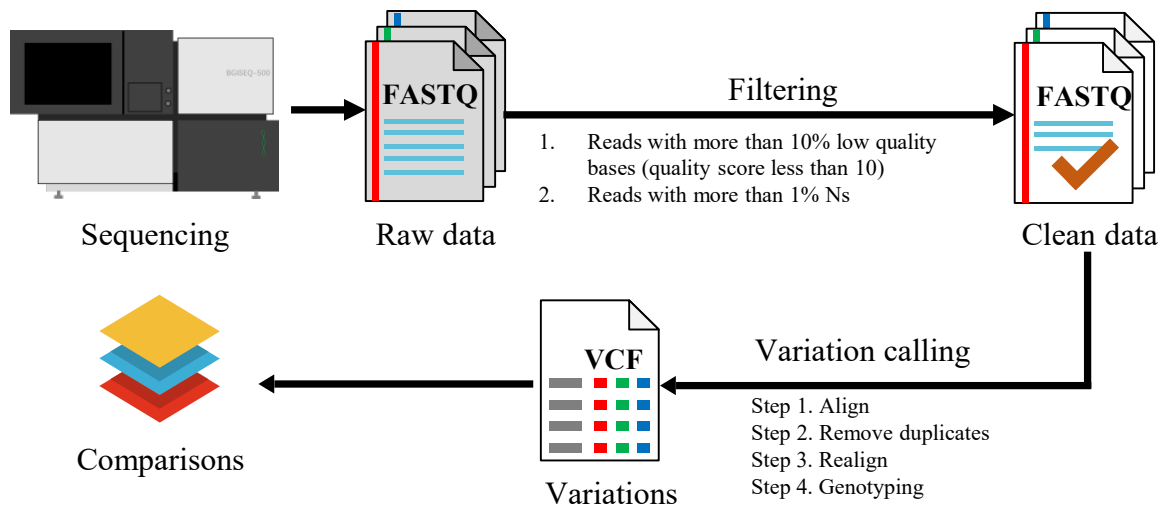

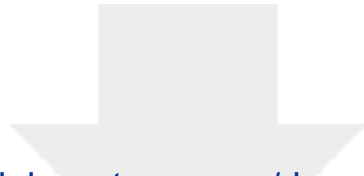

Click here to access/download  
**Supplementary Material**  
RebuttalTables&Figures.docx

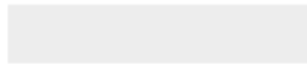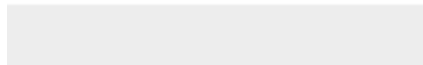

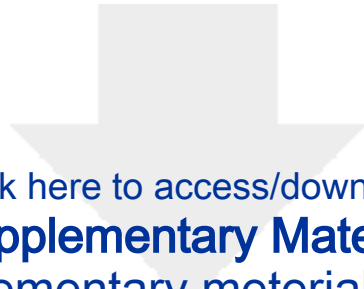

Click here to access/download  
**Supplementary Material**  
Supplementary materials.docx

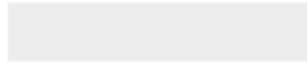



Click here to access/download  
**Supplementary Material**  
RebutallLetter.docx

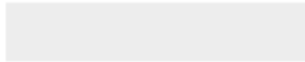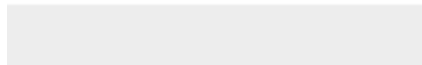



Dear Editor,

Thanks for considering our manuscript entitled *A reference human genome dataset of the BGISEQ-500 sequencer* for possible publication as a datanote in *GigaScience*. We have revised our manuscript according to the suggestions by the two reviewers, and we have addressed all the questions raised by the reviewers thus we are including a rebuttal letter with point-to-point response letter. Furthermore, as we have obtained the pair-end 100 bp (PE100) sequencing data from BGISEQ-500, we have also included the description and analysis of PE100 data here which would make it a unique and comprehensive reference dataset for BGISEQ-500. And sorry for the delay caused by adding the PE100 data. We have also uploaded the PE100 data to ENA as well as GigaDB to make it available for the public.

During the revision, and also for the data generation and analysis of the PE100 data, several people have made substantial contribution thus we would like to include them as authors for this manuscript, with author contributions indicated in the revised manuscript (in the Authors' Contributions section).

The revised manuscript has ~2,300 words in the main text (including the abstract), with four figures and four tables, and one supplementary file (with detailed parameters for the analysis as well as the accuracy assessment in different genome content).

Please let us know if further revision required, and we are looking forward to feedbacks from you and the reviewers. Thanks!

Xin Liu,

BGI Research
